# Supplementary material
Source: bioRxiv or medRxiv preprint supplement (https://www.biorxiv.org/highwire/filestream/94550/field_highwire_adjunct_files/0/307322-1.pdf)
Supplement: Supplementary file [file 307322-1.pdf]

When higher carrying capacities lead to faster propagation:

Supplementary Information

# 1 S1: Growth functions for strong Allee effects

Here we depict the growth functions  $f$  with different values of  $K$ . Fig. 1 depicts the standard one in (1):

$$f(u) = r u (1 - u/K) (u - \rho), \quad (1)$$

with the maximal per capita growth rate increasing with the increase of  $K$ . Fig. 2 depicts the new function defined by (2), with the maximal per capita growth rate independent of  $K$  :

$$f(u) = 4r \frac{K}{(K - \rho)^2} u (1 - u/K) (u - \rho). \quad (2)$$

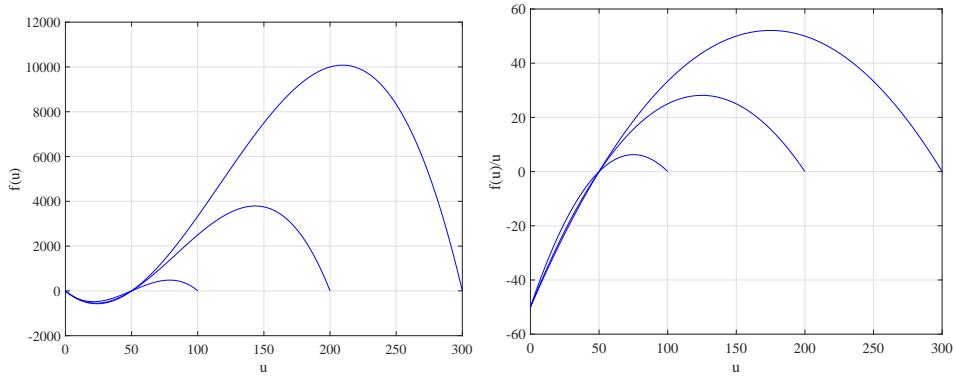

Figure 1: Left: the growth function  $f$  given by the classical formula (1), for  $K = 100, 200, 300$  and  $r = 1, \rho = 50$ . Right: the corresponding per capita growth rate  $f(u)/u$

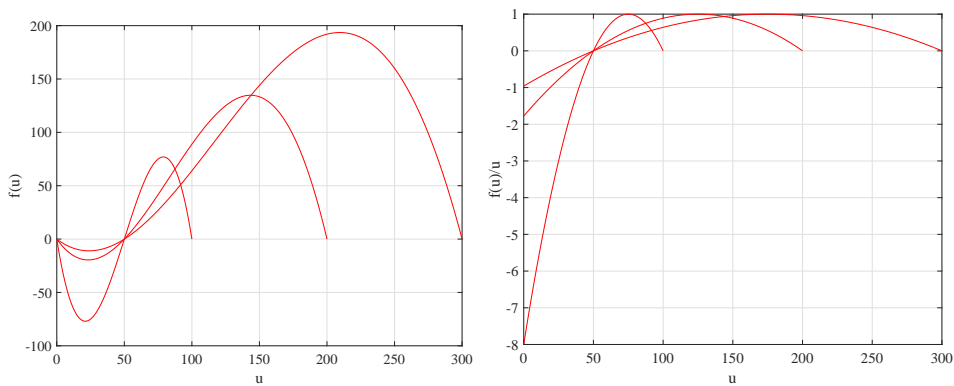

Figure 2: Left: the growth function  $f$  given by the new formula (2), for  $K = 100, 200, 300$  and  $r = 1, \rho = 50$ . Right: the corresponding per capita growth rate  $f(u)/u$

## 2 S2: Weak Allee effects

In the reaction-diffusion framework, weak Allee effects are modeled by positive functions  $f(u)$  (for  $u \in (0, K)$ ), such that the Fisher-KPP assumption  $f(u) \leq f'(0)u$  is not satisfied. This means that there is some optimal positive value of  $u$  for which the per capita growth rate reaches its maximum. This is for instance true for functions of the form (1) and (2) with  $\rho = 0$  (the optimal value of  $u$  is  $K/2$ ), leading to speeds

$$v = \sqrt{\frac{rDK}{2}} \quad (3)$$

and

$$v = \sqrt{2rD}, \quad (4)$$

respectively. With the second form of function, which is more adapted to our study, the propagation speed does not depend on  $K$ .

Another standard form of function  $f$  describing a weak Allee effect is  $f(u) = ru(1 - u/K)(1 + \alpha u)$  (see Turchin, 1998, p. 331), with  $\alpha > 1/K$ . As with the standard form (1) (strong Allee effect), the maximum per capita growth rate depends on  $K$ : it is equal to  $r(1 + \alpha K)^2/(4\alpha K)$ . We can again define a new functional form, for which the maximum per capita growth rate is equal to  $r$ , independently of  $K$ :

$$f(u) = 4r \frac{\alpha K}{(1 + \alpha K)^2} u(1 - u/K)(1 + \alpha u). \quad (5)$$

Using formula (29) in Haderler and Rothe (1975), straightforward computations show that:

$$v = \begin{cases} \frac{4\sqrt{rDK}}{1 + \alpha K} & \text{if } K \in (1/\alpha, 2/\alpha), \\ \sqrt{\frac{2rD}{\alpha} \frac{2 + \alpha K}{1 + \alpha K}} & \text{if } K \geq 2/\alpha. \end{cases} \quad (6)$$

Thus,  $v$  slightly decays with  $K$  for small values of  $K$  and then increases towards an asymptote.

In the IBM framework, as we mentioned in the main text, weak Allee effects can be modeled by taking a threshold  $\rho = 1$  in formula

$$g(N_i) = \begin{cases} N_i \frac{N_i}{\rho R} & \text{if } N_i \leq \rho R, \\ N_i & \text{if } N_i > \rho R, \end{cases} \quad (7)$$

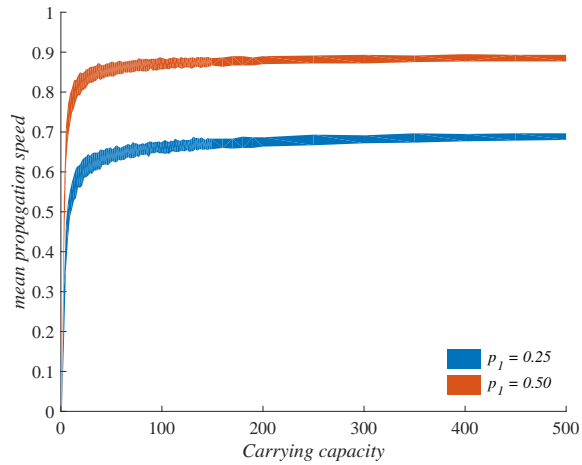

Figure 3: Propagation speed vs carrying capacity: IBM simulations in the case of a weak Allee effect. The shaded regions correspond to 99% confidence intervals for the mean speed obtained with individual-based simulations after 300 generations, with 200 replicate simulations for each scenario. The parameter values are  $R = e^1$  and  $\rho = 1$ .

The result of the IBM simulations in that case are provided in Fig. 3. The dependence of the mean speed  $\bar{v}$  with respect to  $K$  is comparable to that in the null model: it is significant only for low values of  $K$ .

### 3 S3: Presence of density-dependent dispersal

In order to investigate the presence of density-dependent dispersal in our dataset, we performed an Approximate Bayesian Computation (ABC) with the software R. Since we know that there is no Allee effect in *T. chilonis* populations under these experimental conditions (Morel-Journel et al., 2016), we focused on fixed dispersal and positive density-dependent dispersal scenarios. For this analysis, our dataset was summarized by 576 pairs of patches from the front  $(N_i(t), N_{i+1}(t+1))$ , where  $N_i(t)$  is the number of individuals in the patch  $i$  at generation  $t$  and  $N_{i+1}(t+1)$  is the population size in the next patch at time  $t+1$ . Those data come from our main experiment previously described in the article. We compared two scenarios, each one corresponding to a different dispersal type. Each scenario was run 500000 times. We chose as summary statistics the maximal number of parasitized eggs on the edge patch on the 576 couples, the total number of parasitized eggs on the 576 edge patches, the number of empty edge patches, and the number of edge patches with [1:50] parasitized eggs.

For the first scenario (fixed dispersal), we began by drawing the probability of dispersal in the next patch  $p$  and the mean number of offspring per female  $R$  in uniform distributions:  $p \sim \mathcal{U}(0, 1)$  and  $R \sim \mathcal{U}(0, 30)$ . Then,

$$N_{i+1}(t+1) = \sum_{j=1}^{N_i(t)} p_j r_j,$$

where  $p_j \in \{0, 1\}$  follows a Bernoulli distribution with probability  $p/2$ , namely the probability of being a female ( $1/2$ ) and to disperse in the next patch ( $p$ ). The number of offsprings  $r_j$  follows a Poisson distribution with parameter  $R$ :  $r_j \sim \text{Poisson}(R)$ .

For the second scenario (positive density-dependent dispersal), only the dispersal part was changed and was based on a sigmoid-like dependence via a Hill function:

$$p_j = \frac{N_i(t)}{\tau + N_i(t)},$$

where  $\tau$  follows a uniform distribution over an interval such that the minimal probability of dispersal is equal to 0.01 and the maximal probability of dispersal is equal to 0.2 for a population of 500 individuals.

To select the best model, we used the R package *abc* (Csilléry et al., 2012). First we ensured, with a cross validation, that our models were sufficiently different for the analysis to discriminate between them.

The ABC analysis showed a clear positive result for the positive density-dependent migration model,

chosen at 100% against the density-independent migration model.

## 4 S4: Experimental vs simulation results

Using the IBM with positive density-dependent dispersal, we adjusted the parameter value  $R$  so that the mean number of colonized patches after 10 generations was consistent with the experimental results of Section "Experimental study: propagation of a parasitoid wasp in a microcosm" for large  $K$  (modality L in the experimental study and  $K = 400$  in the simulation model). The value of the parameter  $p_1$  was sampled from a uniform distribution in  $(0, 0.04)$ , consistently with the posterior mode found with the ABC approach (0.02, see Supplementary Information S3 for more details regarding the ABC approach). Then, using the same parameter values, we computed the mean number of colonized patches over 10 generations for "very small" ( $K = 70$ ) and "small" ( $K = 200$ ) carrying capacities. The results are presented in Fig. 4a. Consistently with our experimental results, the differences between the small and large modalities are minor during the the first 10 generations. The effect of  $K$  is more visible over the first 10 generations if we compare the large and very small modalities.

If we focus on the dynamics with small and large  $K$  modalities during the first 10 generations, we observe 3 different stages: during the first generations, the two modalities lead to the same dynamics; then during a second stage the largest modality leads to a slightly faster colonization; during the last stage, the two modalities lead to comparable speeds. The existence of these 3 stages is consistent with the experimental results (Fig. 4a).

With the parameter values used here (see the legend of Fig. 4), the asymptotic speeds after large time are 0.09 ( $K = 70$ ), 0.14 ( $K = 200$ ) and 0.17 ( $K = 400$ ) patch per generation. Thus, if the experimental results remain consistent with the simulation model, we expect increasing differences between the different modalities at large times (Fig. 4b).

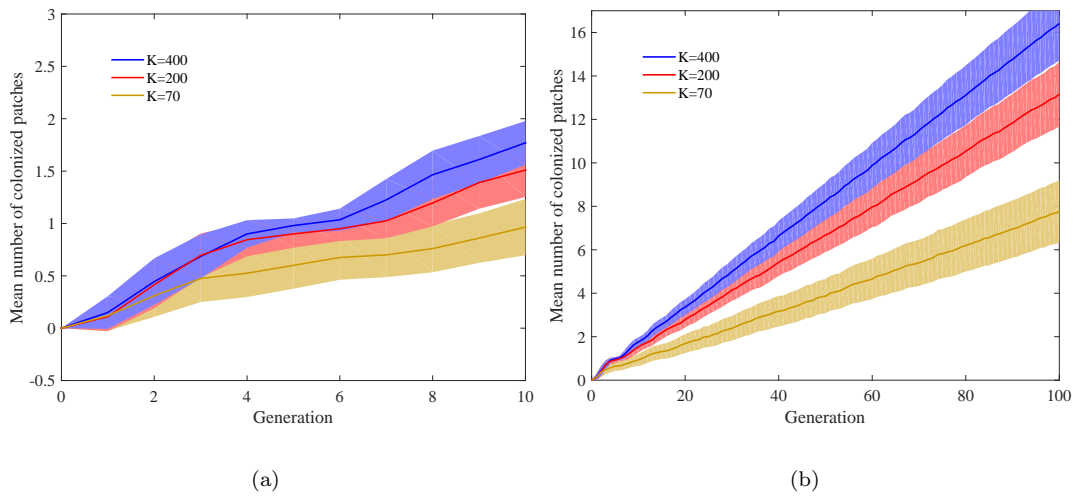

Figure 4: Simulation results: effect of  $K$  on the mean number of colonized patches during the first 10 generations (a) and 100 generations (b). We used the IBM with positive density-dependent dispersal. The probability of migration  $p_1$  was sampled from a uniform distribution in  $(0, 0.04)$  and  $R = 1.7$ . The number of individuals inoculated in the first patch was always equal to 50. The mean values are computed over 200 replicates. The shaded regions correspond to mean 95% confidence intervals obtained over 10 replicates of 20 simulations.



## 5 S5: Very small carrying capacity

Another experiment with a very small  $K$  with 70-90 host eggs (Modality VS), which we conducted for another purpose, led to new results that strongly support our conclusions. In spite of a slightly different experimental protocol, we believe that these results can be compared to those in the main text, see Fig 5. The main differences in the experimental protocol are presented in the Table 1. In order to compare the three modalities, we plotted the very small modality from the third generation to account for the time to reach carrying capacity in the other modalities.

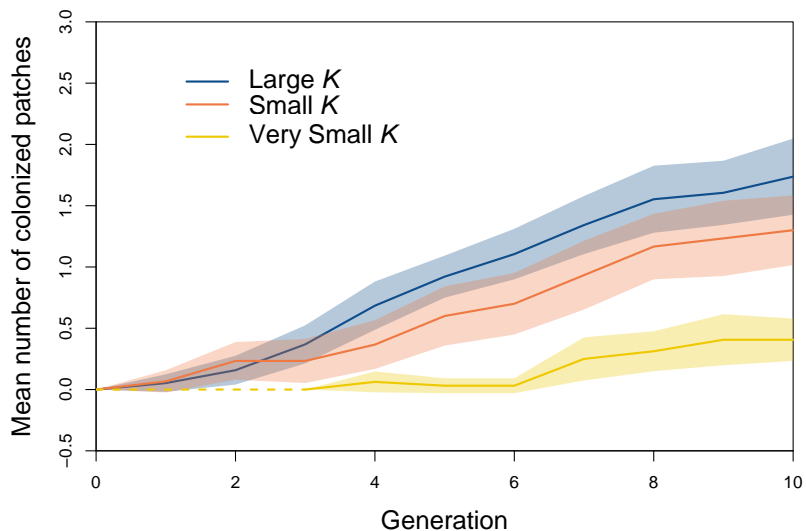

Figure 5: Mean number of colonized patches over the 38 replicated populations for modality L, 30 for the modality S, and 32 for the modality VS. The yellow line corresponds to the very small carrying capacity 70-90 host eggs, red line corresponds to the small carrying capacity 150-200 host eggs, and the blue line corresponds to the large carrying capacity 400-450 host eggs. Envelopes around the lines represent the 95% confident interval.

|                                              | <b>Experiment 1</b>                        | <b>Experiment 2</b>                           |
|----------------------------------------------|--------------------------------------------|-----------------------------------------------|
| <b>Maintenance conditions and life cycle</b> |                                            |                                               |
| Night and day time                           | 16h day/8h night                           |                                               |
| Humidity                                     | around 70%                                 |                                               |
| Life cycle                                   | last 9 days                                | last 15 days                                  |
| Temperature                                  | 25°C                                       | 20°C                                          |
| Host eggs                                    | <i>Ephestia kuehniella</i>                 |                                               |
| <b>Experimental system</b>                   |                                            |                                               |
| Landscape Size                               | 11 patches                                 | 7 patches                                     |
| Initial colonized patches                    | 1                                          | 4                                             |
| Location of initial colonized patches        | middle                                     | both edges                                    |
| Number of individuals inoculated             | 50                                         | $K$ (70-90)                                   |
| Spatial dynamics                             | spread on both sides from the middle patch | spread from the edges, filling the middle gap |
| Time for dispersal/reproduction              | 2 days                                     |                                               |

Table 1: Table of similarities and differences between the main experiment presented in this paper (Experiment 1) and the posterior experiment with a very small carrying capacity modality (Experiment 2).

## References

- Csilléry, K., O. François, and M. G. Blum (2012). abc: an r package for approximate bayesian computation (abc). *Methods in ecology and evolution* 3(3), 475–479.
- Hadeler, K. P. and F. Rothe (1975). Travelling fronts in nonlinear diffusion equations. *J Math Biol* 2(3), 251–263.
- Morel-Journel, T., P. Girod, L. Mailleret, A. Auguste, A. Blin, and E. Vercken (2016). The highs and lows of dispersal: how connectivity and initial population size jointly shape establishment dynamics in discrete landscapes. *Oikos* 125(6), 769–777.
- Turchin, P. (1998). *Quantitative Analysis of Movement: Measuring and Modeling Population Redistribution in Animals and Plants*. Sinauer, Sunderland, MA.
